# Supplementary material for: Forest-like TiO2 hierarchical structures for efficient dye-sensitized solar cells
Source: Royal Society of Chemistry journal article supplement (doi:10.1039/c2jm15442k), 2012-01-01
Supplement: c2jm15442k.pdf [file c2jm15442k.pdf]

Electronic Supplementary Information (ESI) for Journal of Material Chemistry  
This journal is (c) The Royal Society of Chemistry 2011

## **Forest-like TiO<sub>2</sub> hierarchical structures for efficient dye-sensitized solar cells**

*Fang Shao, Jing Sun\*, Lian Gao, Songwang Yang and Jianqiang Luo*

*The State Key Lab of High Performance Ceramics and Superfine Microstructure,*

*Shanghai Institute of Ceramics, Chinese Academy of Sciences, 1295 Ding Xi Road,*

*Shanghai 200050, China*

*E-mail address: [jingsun@mail.sic.ac.cn](mailto:jingsun@mail.sic.ac.cn) (J. Sun)*

*Tel: +86-21-52414301. Fax: +86-21-52414903*

Electronic Supplementary Information (ESI) for Journal of Material Chemistry  
This journal is (c) The Royal Society of Chemistry 2011

## Supplementary Graphics

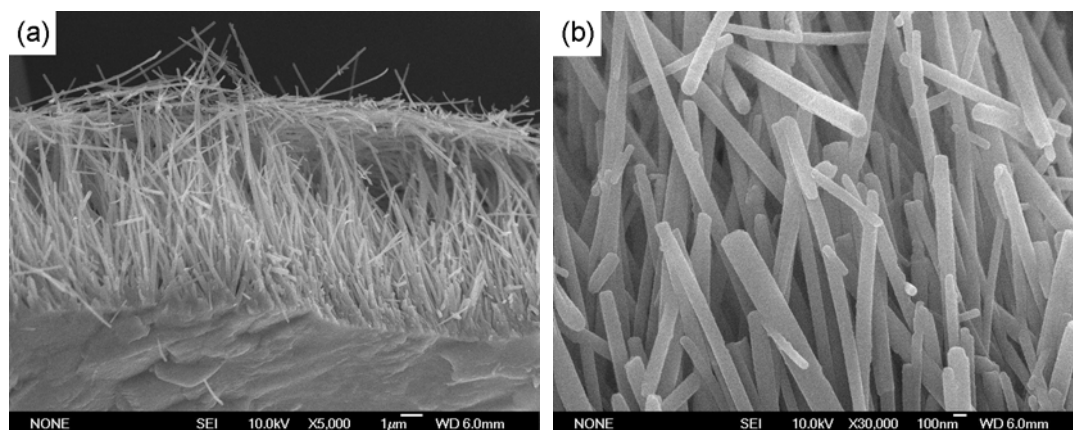

**Fig. S1** SEM images of the  $\text{H}_2\text{Ti}_2\text{O}_5 \cdot \text{H}_2\text{O}$  films without  $\text{H}_2\text{SO}_4$  treatment.

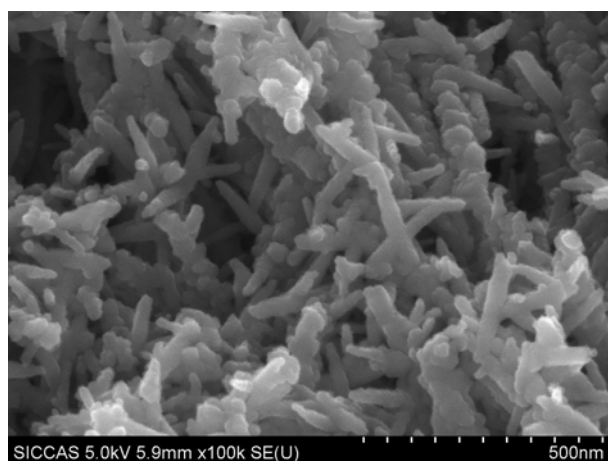

**Fig. S2** High resolution SEM image of the nanoforest films after  $\text{H}_2\text{SO}_4$  hydrothermal treatment.

Electronic Supplementary Information (ESI) for Journal of Material Chemistry  
This journal is (c) The Royal Society of Chemistry 2011

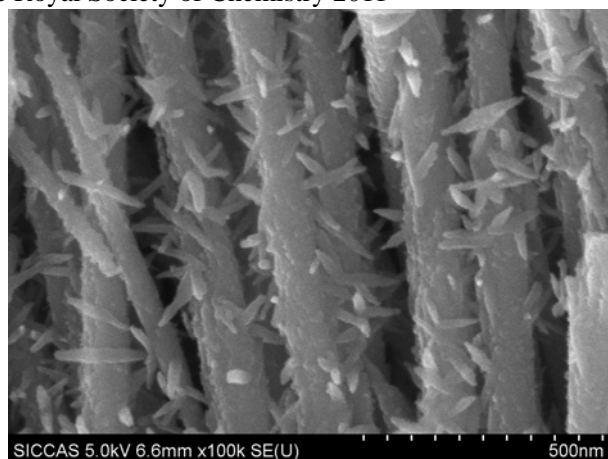

**Fig. S3** High resolution SEM image of the nanoforest films obtained with  $H_2SO_4$  corrosion on the heating holder in stead of hydrothermal reaction.

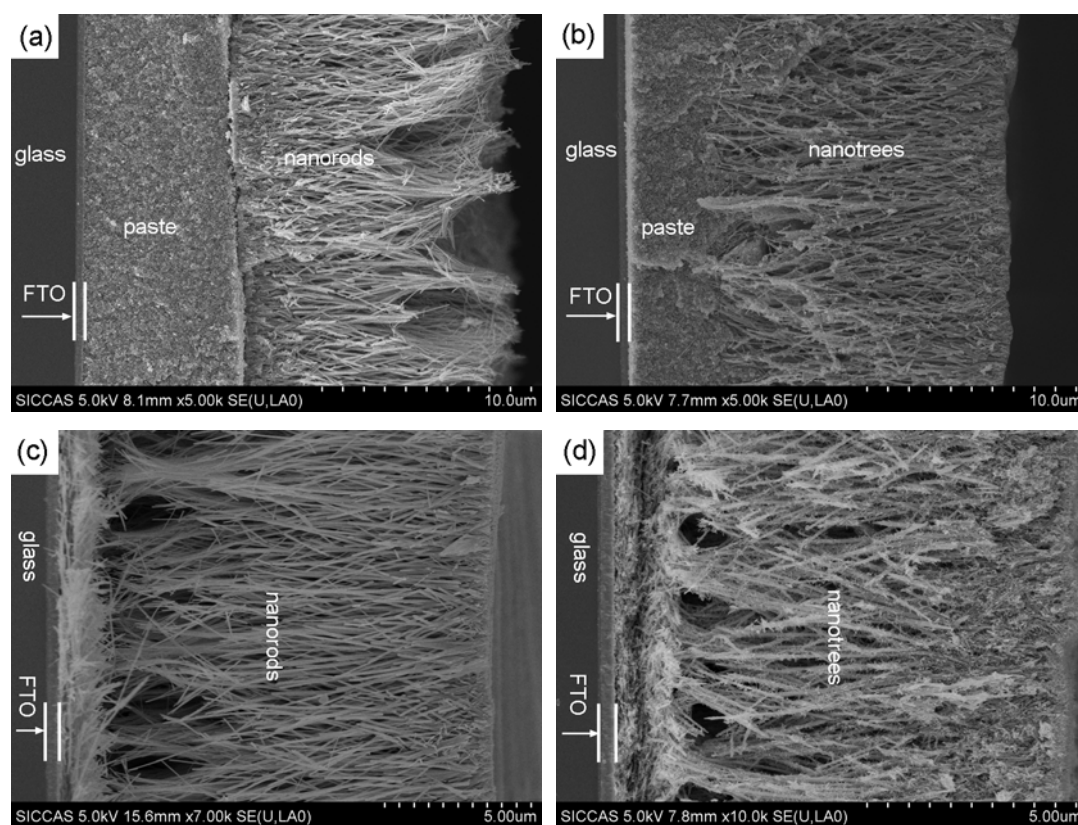

**Fig. S4** SEM images of  $TiO_2$  on FTO glasses (a) NR1, (b) NT1, (c) NR2, (d) NT2.

Electronic Supplementary Information (ESI) for Journal of Material Chemistry  
This journal is © The Royal Society of Chemistry 2011

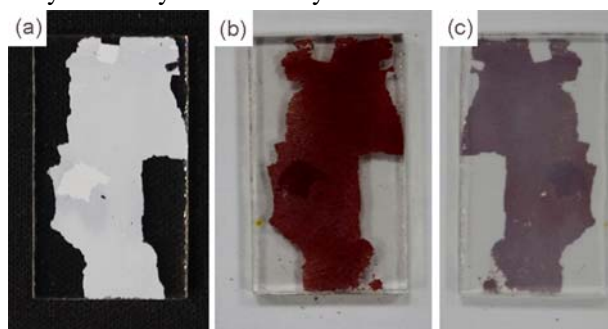

**Fig. S5** Photographic images of the NT2 photoanodes (a) a sample after heat treatment, (b) the front of the sensitized photoanode, (c) the back of the sensitized photoanode.
